# Supplementary material for: The impact of host resistance on cumulative mortality and the threshold of herd immunity for SARS-CoV-2
Source: bioRxiv or medRxiv preprint supplement (doi:10.1101/2020.07.15.20154294), 2020-10-01
Supplement: Supplementary file [file 2020.07.15.20154294-1.pdf]

## Supplementary Figures

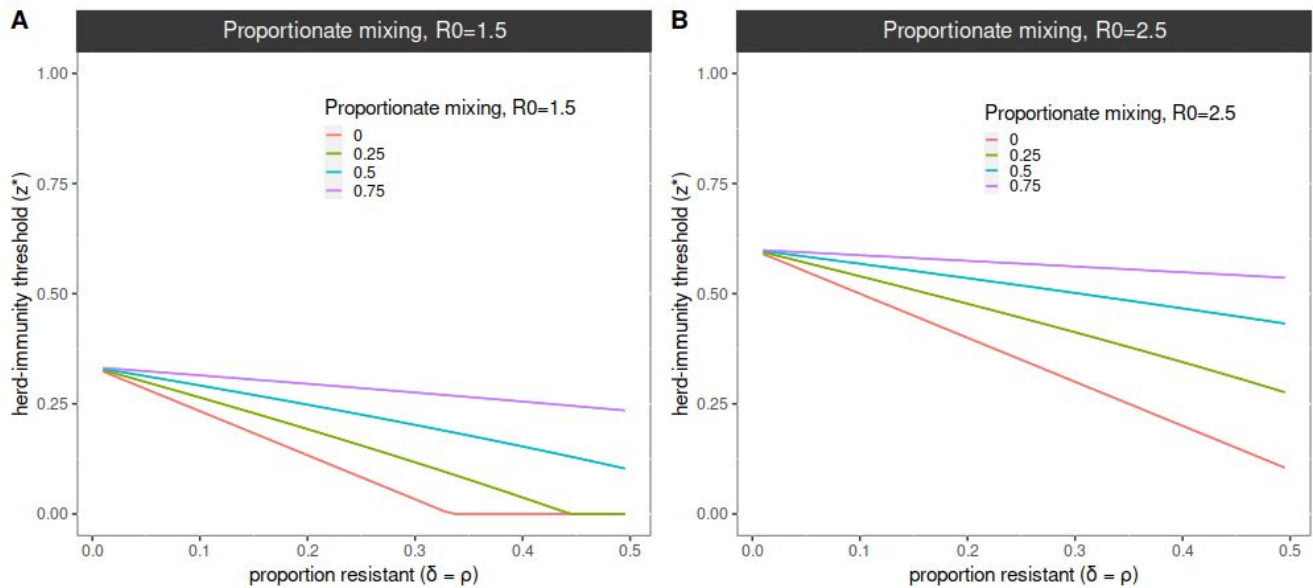

**Figure S1 - Herd-immunity threshold under proportionate mixing and incomplete resistance.** (left) Herd-immunity threshold ( $z^*$ ) under proportionate mixing ( $\delta = \rho$ ) and incomplete resistance  $F = R_{0_1}/R_{0_2}$  with  $R_0 = 1.5$ . (right) Same output as in the left panel but for with  $R_0 = 2.5$ . The scenario of  $F = 0$  is fully explored in the main text. Simulations ran for 365 days with an infectious period ( $1/\sigma$ ) of 5 days,  $\gamma = 0$ ,  $\delta = \rho$ .

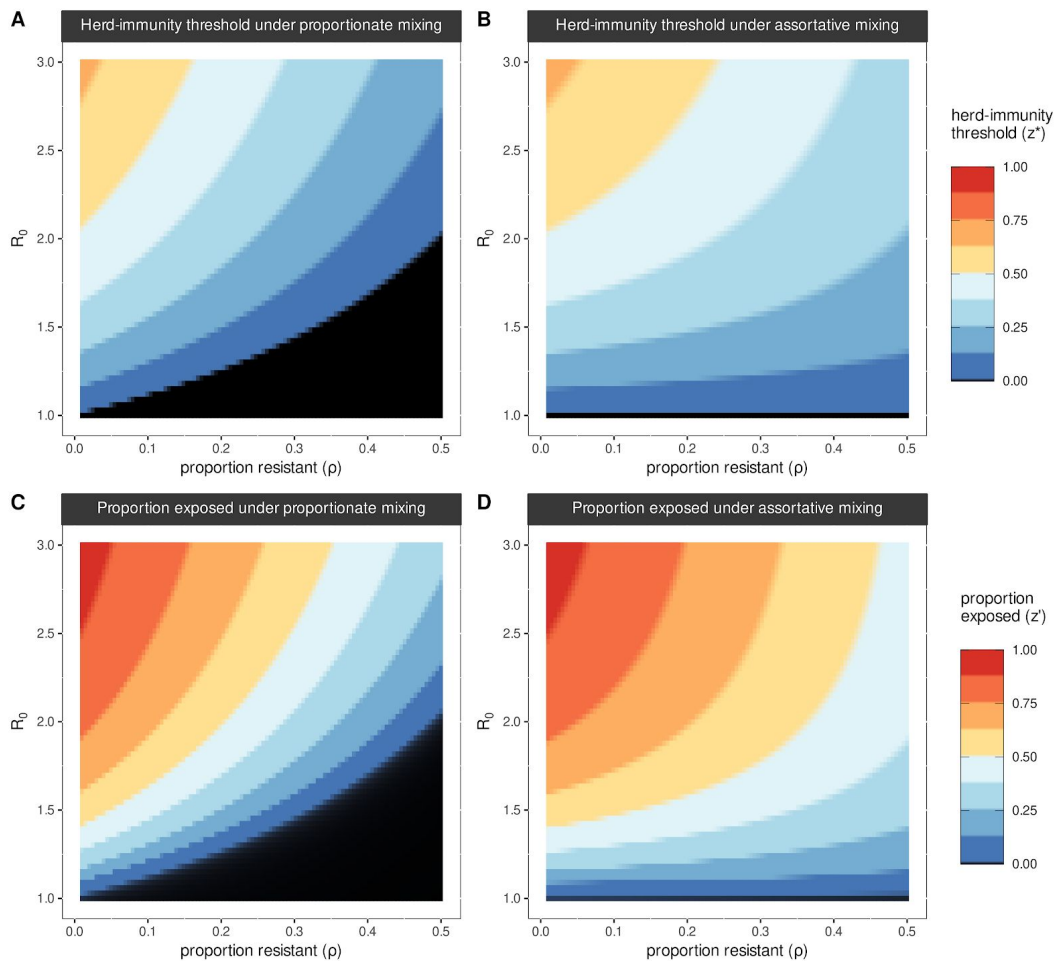

**Figure S2 - Herd-immunity threshold and proportion exposed under proportionate and assortative mixing.** Herd-immunity threshold ( $z^*$ , panel A) when varying proportion of the population fully resistant ( $\rho$  with  $R_{0_1} = 0$  and  $R_0 = R_{0_2}$ ) under proportionate mixing ( $\delta = \rho$ ). Panel B shows the same outputs but under assortative mixing ( $\delta = 1$ ). Proportion exposed ( $z'$ , i.e. final exposed at the end of simulation) under proportionate mixing (C) and assortative mixing (D). Simulations ran for 365 days with an infectious period ( $1/\sigma$ ) of 5 days,  $\gamma = 0$ . Each color band in the color scales equates to a 0.125 change, and black covers the range 0-0.01.

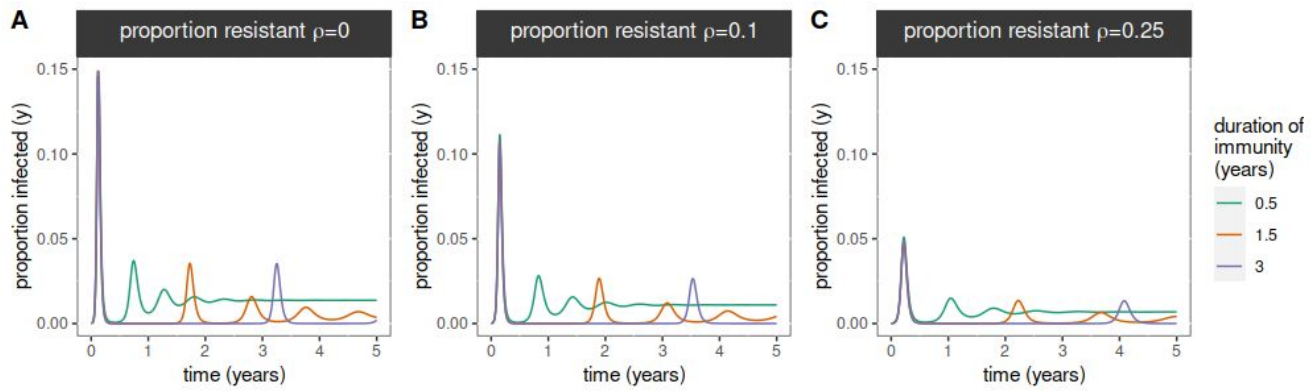

**Figure S3 - Effect of duration of immunity.** Time series of proportion infected ( $y$ ) for varying proportion of resistant ( $\rho$ ) and duration of immunity ( $1/\gamma$ , color scale) under proportionate mixing ( $\delta = \rho$ ). Proportion of resistant ( $\rho$ ) for each panel is presented on the title. Infectious period  $1/\sigma = 5$  days.
